# Supplementary material
Source: PubMed Central journal article supplement (PMC3442571)
Supplement: supp_tpc.112.098707_tpc098707Supplemental.pdf [file supp_tpc.112.098707_tpc098707Supplemental.pdf]

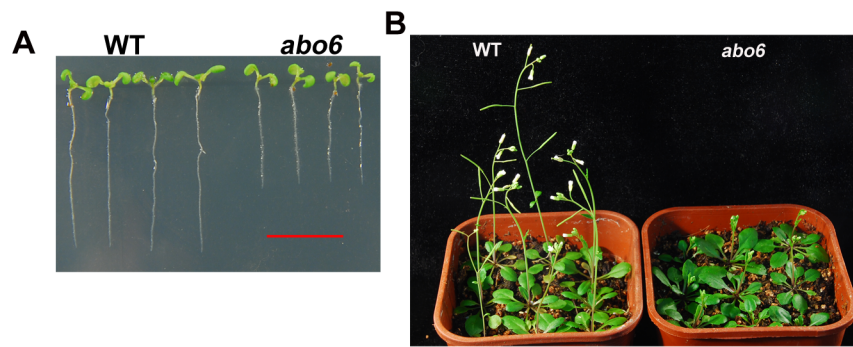

Figure S1 The growth phenotype of *abo6*. A. Seedlings (7 days) in a plate. Bar= 1cm. B. Plants (4 weeks) in soil.

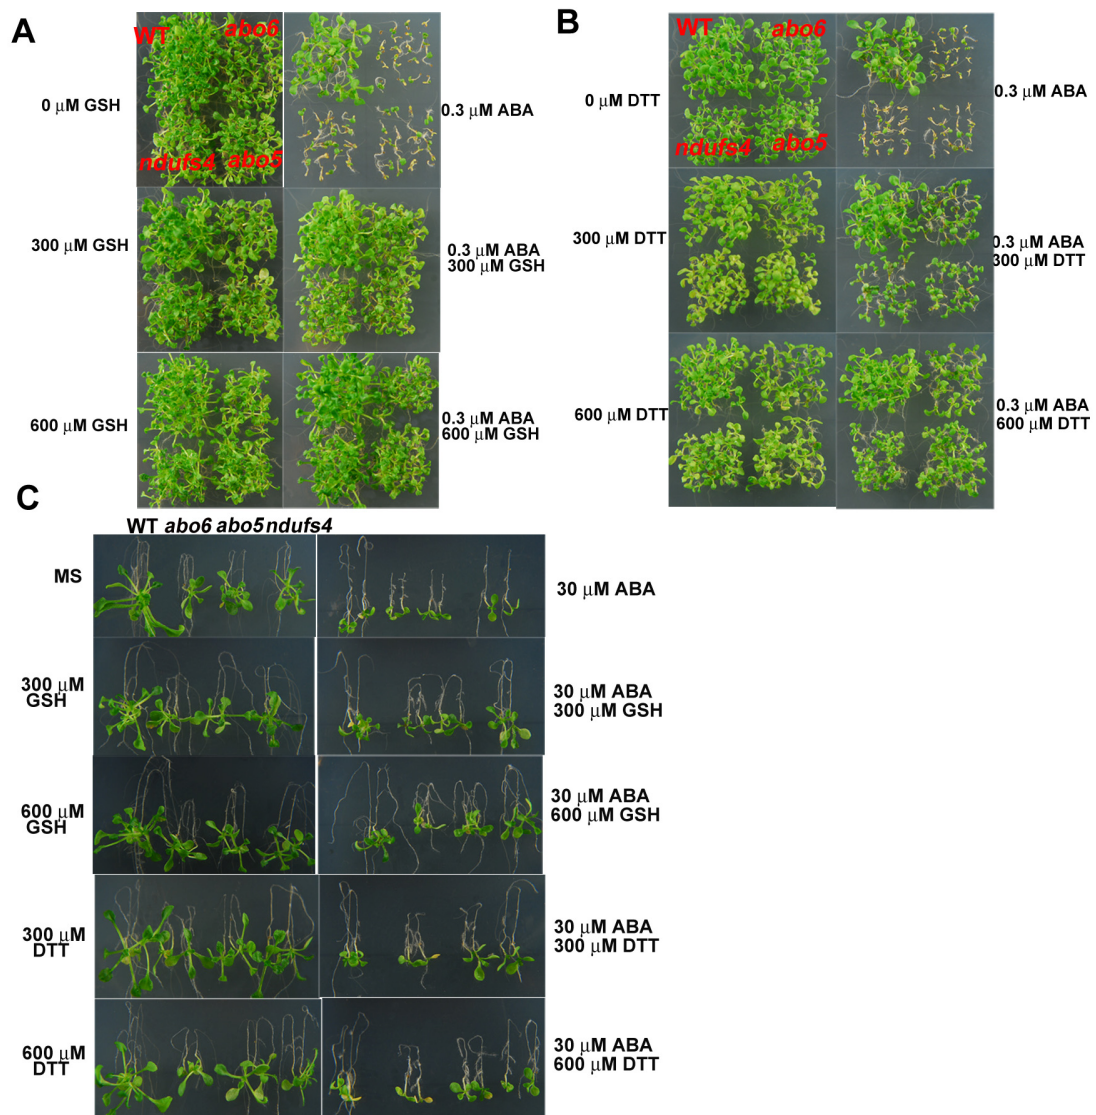

Figure S2. Seed germination and root growth of *ndufs4* and *abo5* on ABA-containing

MS medium supplemented with GSH or DTT. A. Seed germination on GSH and ABA. B. Seed germination on DTT and ABA. C. Root growth on GSH or DTT and ABA.

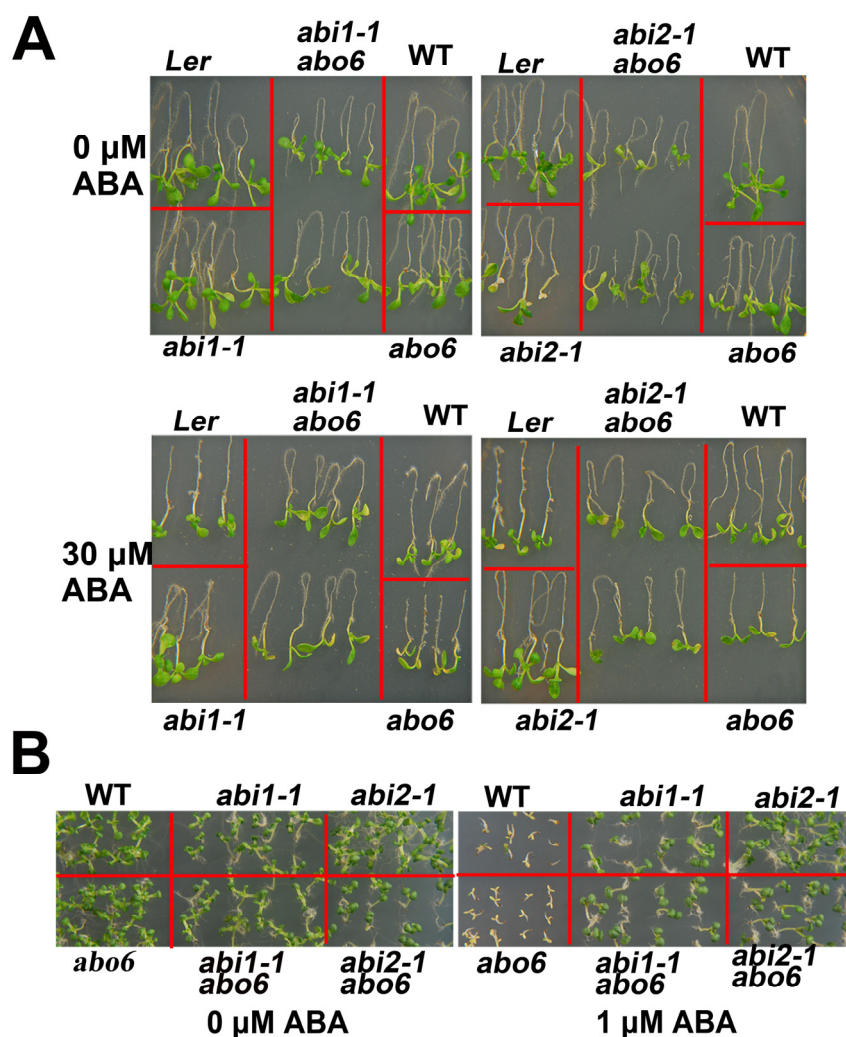

Figure S3. Seed germination and root growth of *abo6*, WT, *Ler*, *abi1-1*, *abi2-1*, *abi1-1 abo6*, and *abi2-1 abo6* in response to ABA.

A. Root growth of *abo6*, WT, *Ler*, *abi1-1*, *abi2-1*, *abi1-1 abo6*, and *abi2-1 abo6* in response to ABA. Five-day-old seedlings were transferred to MS medium or MS medium containing 30  $\mu$ M ABA for 7 days before photographed.

B. Seed germination greening of *abo6*, WT, *Ler*, *abi1-1*, *abi2-1*, *abi1-1 abo6*, and *abi2-1 abo6* as affected by ABA. Plates were kept in a growth chamber for 7 days.

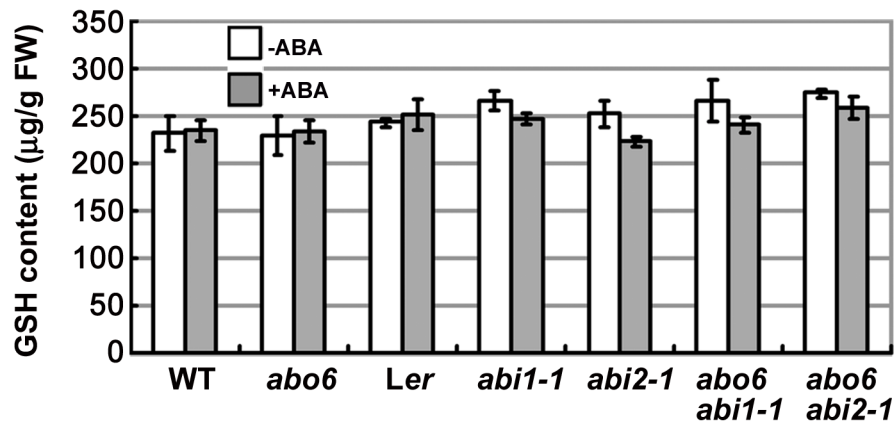

Figure S4 GSH contents in the roots of wild type (WT, *g11*), *abo6*, *Ler*, *abi1-1*, *abi2-1* *abo6 abi1-1* and *abo6 abi2-1* under ABA and no ABA treatments. Three independent experiments were done with similar results, each with three biological repeats. Data are from one experiment.

Table S1: Primers used to amplify fragment in Northern blot.

| Name   | Forward primer             | Reverse primer               |
|--------|----------------------------|------------------------------|
| NAD1b  | CTGTACTAATATGTGTAGGTCCCCGT | AGCTGCAACTGATTTCAGCT         |
| NAD1c  | GGTCCATGCACATTGTTCTTTCCA   | AGGAAGCCATTGAAAGGTGACT       |
| NAD2a  | CCTTGCTTCTGCTCGCCGCT       | CGAGCCGGCTCCGTGGA            |
| NAD2b  | GTGGGCACCAGATATCTATGAGG    | CGACCTATAACGCTAGTCACTACT     |
| NAD4   | CGAACATACAGGGAATTGGAGGT    | CTCTGCCATTTGAATCGGAGA        |
| NAD5a  | GCCAATGTTGGTGACTGGAGAT     | CCGAATAGTTAGAGATGCCGCA       |
| NAD5c  | GCCGAATCCGAGTTTGCTGCT      | CCACTTTGAAGTTGACTTATTTCGTC   |
| NAD7   | GATGGCCCAAGAACACGCTCAT     | GACCTCTTAACATTACACCACTGAATCC |
| COX2   | GTGATGCAGCGGAACCAT         | CTCACTGCACTGACCATAGT         |
| RPL2   | TCAGATCGCTCCAGTACGATGGATC  | ACAGGTGCACGATCGACTTTGC       |
| RPS3   | TCGACCACGACGACTGAAACGAC    | ACTGCAGGGAGGGTCCGTAG         |
| CCB452 | TCAGTAGAGATGTTCCCACGGGTG   | ATCAGCTGTCCGGCTCCTTGGTAAG    |

Table S2: Primers used for qRT-PCR

| Name  | Forward primer           | Reverse primer           |
|-------|--------------------------|--------------------------|
| AOX1a | ATGTTCTGCTCCGGCTATTGCTA  | AGCTGGAGCTTCCTTTAGTTCACG |
| NDB2  | GCATCTGGGACAATTTGCACCACT | ACGCCTCATCCAATCTGAAACCAC |
| NDB3  | ACTTCCAGGAGACTGGGTTTCGAT | AATGCGACTTGAATCCCTCCCGAA |
| NDB4  | TGCTCAAGAGTGCAAATGGTGAGG | TACCTGAATGGCTGGAACCGATGT |
| ABO6  | TGGTTCATTGAGCACGGGAGTACA | TGTCACGGCCAAAGACAAATCTGC |

|          |                          |                         |
|----------|--------------------------|-------------------------|
| RD29A    | ATGGACAAAGCAATGAGCATGAGC | TCCTTACAGAATGAGCCGGTGC  |
| ACTIN2/8 | ACGGTAACATTGTGCTCAGTGGTG | CTTGGAGATCCACATCTGCTGGA |

Table S3: Primers used for the splicing qRT-PCR experiment of mitochondrial transcripts.

| Name         | Forward primer              | Reverse primer              |
|--------------|-----------------------------|-----------------------------|
| NAD1 F1      | GACCAATAGATACTTCATAAGAGACCA | GACCAATAGATACTTCATAAGAGACCA |
| NAD1 intron1 | CGTGCTCGTACGGTTCATAG        | GACCAATAGATACTTCATAAGAGACCA |
| NAD1 F2      | TCTGCAGCTCAAATGGTCTC        | ATTCAGCTTCCGCTTCTGG         |
| NAD1 intron2 | TCTGCAGCTCAAATGGTCTC        | GGTTGGGTTAGGGGAACATC        |
| NAD1 F3      | TCCGTTTGATCTCCCAGAAG        | AAAAGAGCAGACCCCATTGA        |
| NAD1 intron3 | GGGAGCTGTATGAGCGGTAA        | AAAAGAGCAGACCCCATTGA        |
| NAD1 F4      | TCTTCAATGGGGTCTGCTC         | AGCCCGGGATCTTCTTGA          |
| NAD1 intron4 | ACGGAGCTGCATCCCTACT         | AGCCCGGGATCTTCTTGA          |
| NAD2 F1      | GGATCCTCCCACACATGTTC        | GCGAGCAGAAGCAAGGTTAT        |
| NAD2 intron1 | CCCATTCTAACCAGTGGAG         | GCGAGCAGAAGCAAGGTTAT        |
| NAD2 F2      | AATATTTGATCTTAGGTGCATTTTC   | AAAGGAACTGCAGTGATCTTGA      |
| NAD2 intron2 | AATATTTGATCTTAGGTGCATTTTC   | CCCGATCCGATAGTTTACAA        |
| NAD2 F3      | CTATGGGTCTACTGGAGCTACCC     | GCGCAATAGAAAAGGAATGCT       |
| NAD2 intron3 | GGCGAATTTCAAACCTGTGG        | GCGCAATAGAAAAGGAATGCT       |
| NAD2 F4      | TATTTGTTCTTCGCCGCTTT        | CAAAGGAGAGGGGTATAGCAA       |
| NAD2 intron4 | TATTTGTTCTTCGCCGCTTT        | CTTATTCGTGGCAACCTTCC        |
| NAD4 F1      | ATTCTATGTTTTTCCCGAAAGC      | GAAAAACTGATATGCTGCCTTG      |
| NAD4 intron1 | CCGTATGATGCGGAAGTCTC        | GAAAAACTGATATGCTGCCTTG      |
| NAD4 F2      | AATACCCATGTTTCCCGAAG        | TGCTACCTCCAATTCCTGT         |
| NAD4 intron2 | GCGGAACGACCAGAAAAATA        | TGCTACCTCCAATTCCTGT         |
| NAD4 F3      | TTCCTCCATAAATTCTCCGATT      | TGAAATTTGCCATGTTGCAC        |
| NAD4 intron3 | TCTAGCTTGGTTCGGAGAGC        | TGAAATTTGCCATGTTGCAC        |
| NAD5 F1      | CCATGGATCTCATCGGAAAT        | TGGACCAAGCTACTTATGGATG      |
| NAD5 intron1 | TTCGCAAATAGGTCCGACT         | TGGACCAAGCTACTTATGGATG      |
| NAD5 F2      | CTGGCTCTCGGGAGTCTCTT        | AACTCGGATTCGGCAAGAA         |
| NAD5 intron2 | CTGGCTCTCGGGAGTCTCTT        | GTACGATCGTGTCGGGTGA         |
| NAD5 intron3 | GCCGTGTAATAGGCGACCA         | AACTCGGATTCGGCAAGAA         |
| NAD5 F3      | GTTCTGCGTTTCGGATATG         | AACATTGCAAAGGCATAATGA       |
